# Supplementary material for: Global distribution modelling, invasion risk assessment and niche dynamics of Leucanthemum vulgare (Ox-eye Daisy) under climate change
Source: PubMed Central journal article supplement (PMC6684661; doi:10.1038/s41598-019-47859-1), 2019-08-06
Supplement: 41598_2019_47859_MOESM1_ESM.pdf [file 41598_2019_47859_MOESM1_ESM.pdf]

**Global distribution modelling, invasion risk assessment and niche dynamics of  
*Leucanthemum vulgare* (Ox-eye Daisy) under climate change**

*Rameez Ahmad*<sup>1</sup>, *Anzar A. Khuroo*<sup>1\*</sup>, *Bipin Charles*<sup>2</sup>, *Maroof Hamid*<sup>1</sup>, *Irfan Rashid*<sup>3</sup>,

*N. A. Aravind*<sup>2</sup>

<sup>1</sup>Centre for Biodiversity & Taxonomy, Department of Botany

University of Kashmir, Srinagar – 190006, J & K, India

<sup>2</sup>Ashoka Trust for Research in Ecology and the Environment (ATREE),

Royal Enclave, Srirampura, Jakkur PO, Bengaluru – 560064, India

<sup>3</sup>Biological Invasions Laboratory, Department of Botany

University of Kashmir, Srinagar – 190006, J & K, India

\*Corresponding author e-mail: [anzarak@gmail.com](mailto:anzarak@gmail.com)

## Supplementary information

**Supplementary Table S1:** AUC (ROC), TSS and KAPPA values of ensemble model

|              | Testing data | Cut off | Sensitivity | Specificity |
|--------------|--------------|---------|-------------|-------------|
| <b>TSS</b>   | 0.850        | 445.0   | 95.754      | 89.225      |
| <b>ROC</b>   | 0.977        | 438.5   | 95.799      | 89.225      |
| <b>KAPPA</b> | 0.845        | 46.0    | 99.094      | 81.370      |

**Supplementary Table S2:** Regional invasion risk categorization in terms of the area (km<sup>2</sup>) invaded by *Leucanthemum vulgare* under current climatic conditions.

| Category                             | Southern America | Oceania          | Northern America   | Australia       | Asia            | Africa          |
|--------------------------------------|------------------|------------------|--------------------|-----------------|-----------------|-----------------|
| <b>No Risk</b><br>(0 - 0.25)         | 12,753,989       | 111,387          | 26,523,996         | 5,805,395       | 48,378,451      | 23,818,782      |
| <b>Low Risk</b><br>(0.25 - 0.5)      | 1,017,237        | 6,901            | 2,745,450          | 323,734         | 1,940,117       | 329,071         |
| <b>Moderate Risk</b><br>(0.5 - 0.75) | 563,076          | 51,452           | 2,834,536          | 177,547         | 554,858         | 84,343          |
| <b>High Risk</b><br>(0.75 - 1)       | 234,038          | 214,258          | 2,636,435          | 263,849         | 280,962         | 8466            |
| Total Area<br>(Sq. km)               | 14,568,340       | 383,998          | 34,740,417         | 6,570,525       | 51,154,388      | 24,240,662      |
| <b>Invaded Area</b><br><b>(%age)</b> | 2%               | 56%              | 8%                 | 4%              | 1%              | 0.03%           |
| <b>Risk Category</b>                 | <b>Low Risk</b>  | <b>High Risk</b> | <b>Medium Risk</b> | <b>Low Risk</b> | <b>Low Risk</b> | <b>Low Risk</b> |

**Supplementary Table S3:** Regional invasion risk categorization in terms of the area (km<sup>2</sup>) invaded by *Leucanthemum vulgare* under RCP 2.6 2050.

| Category                             | Southern America | Oceania | Northern America | Australia | Asia       | Africa     |
|--------------------------------------|------------------|---------|------------------|-----------|------------|------------|
| <b>No Risk</b><br>(0 - 0.25)         | 13,594,190       | 113,808 | 27,148,802       | 6,173,220 | 49,748,837 | 24,168,654 |
| <b>Low Risk</b><br>(0.25 - 0.5)      | 229,345          | 6,934   | 1,582,092        | 81,758    | 438,646    | 36,909     |
| <b>Moderate Risk</b><br>(0.5 - 0.75) | 322,203          | 32,051  | 1,861,275        | 81,247    | 338,607    | 26,928     |
| <b>High Risk</b><br>(0.75 - 1)       | 422,604          | 231,206 | 4,148,315        | 234,286   | 628,281    | 8,186      |
| Total Area                           | 14,568,342       | 383,999 | 34,740,484       | 6,570,511 | 51,154,371 | 24,240,677 |

|                            |                 |                  |                    |                 |                 |                 |
|----------------------------|-----------------|------------------|--------------------|-----------------|-----------------|-----------------|
| (Sq. km)                   |                 |                  |                    |                 |                 |                 |
| <b>Invaded Area (%age)</b> | 3%              | 60%              | 12%                | 4%              | 1%              | 0.03%           |
| <b>Risk Category</b>       | <b>Low Risk</b> | <b>High Risk</b> | <b>Medium Risk</b> | <b>Low Risk</b> | <b>Low Risk</b> | <b>Low Risk</b> |

**Supplementary Table S4:** Regional invasion risk categorization in terms of the area (km<sup>2</sup>) invaded by *Leucanthemum vulgare* under RCP 2.6 2070.

| Category                             | Southern America | Oceania          | Northern America   | Australia       | Asia            | Africa          |
|--------------------------------------|------------------|------------------|--------------------|-----------------|-----------------|-----------------|
| <b>No Risk</b><br>(0 - 0.25)         | 13,624,066       | 113,808          | 27,529,029         | 6,196,558       | 49,700,086      | 24,170,170      |
| <b>Low Risk</b><br>(0.25 - 0.5)      | 213,072          | 4,645            | 1,352,072          | 75,828          | 469,016         | 38,787          |
| <b>Moderate Risk</b><br>(0.5 - 0.75) | 310,970          | 26,303           | 1,921,209          | 93,039          | 395,181         | 23,684          |
| <b>High Risk</b><br>(0.75 - 1)       | 420,232          | 239,243          | 3,938,175          | 205,084         | 590,087         | 8,037           |
| Total Area<br>(Sq. km)               | 14,568,340       | 383,999          | 34,740,485         | 6,570,509       | 51,154,370      | 24,240,678      |
| <b>Invaded Area (%age)</b>           | 3%               | 62%              | 11%                | 3%              | 1%              | 0.03%           |
| <b>Risk Category</b>                 | <b>Low Risk</b>  | <b>High Risk</b> | <b>Medium Risk</b> | <b>Low Risk</b> | <b>Low Risk</b> | <b>Low Risk</b> |

**Supplementary Table S5:** Regional invasion risk categorization in terms of the area (km<sup>2</sup>) invaded by *Leucanthemum vulgare* under RCP 4.5 2050.

| Category                             | Southern America | Oceania          | Northern America   | Australia       | Asia            | Africa          |
|--------------------------------------|------------------|------------------|--------------------|-----------------|-----------------|-----------------|
| <b>No Risk</b><br>(0 - 0.25)         | 13,683,243       | 121,087          | 27,067,638         | 6,257,118       | 49,634,470      | 24,200,030      |
| <b>Low Risk</b><br>(0.25 - 0.5)      | 181,779          | 13,654           | 1,773,819          | 70,080          | 516,120         | 25,594          |
| <b>Moderate Risk</b><br>(0.5 - 0.75) | 237,580          | 34,966           | 1,960,111          | 76,042          | 351,898         | 11,397          |
| <b>High Risk</b><br>(0.75 - 1)       | 465,739          | 214,291          | 3,938,916          | 167,269         | 651,883         | 3,656           |
| Total Area<br>(Sq. km)               | 14,568,341       | 383,998          | 34,740,484         | 6,570,509       | 51,154,371      | 24,240,677      |
| <b>Invaded Area (%age)</b>           | 3%               | 56%              | 11%                | 3%              | 1%              | 0.02%           |
| <b>Risk Category</b>                 | <b>Low Risk</b>  | <b>High Risk</b> | <b>Medium Risk</b> | <b>Low Risk</b> | <b>Low Risk</b> | <b>Low Risk</b> |

**Supplementary Table S6:** Regional invasion risk categorization in terms of the area (km<sup>2</sup>) invaded by *Leucanthemum vulgare* under RCP 4.5 2070.

| Category                             | Southern America | Oceania          | Northern America   | Australia       | Asia            | Africa          |
|--------------------------------------|------------------|------------------|--------------------|-----------------|-----------------|-----------------|
| <b>No Risk</b><br>(0 - 0.25)         | 13,721,602       | 125,600          | 26,378,105         | 6,270,870       | 49,195,165      | 24,206,470      |
| <b>Low Risk</b><br>(0.25 - 0.5)      | 158,820          | 11,562           | 1,399,604          | 81,230          | 756,912         | 19,830          |
| <b>Moderate Risk</b><br>(0.5 - 0.75) | 246,259          | 36,662           | 2,695,595          | 68,960          | 369,208         | 11,068          |
| <b>High Risk</b><br>(0.75 - 1)       | 441,660          | 210,174          | 4,267,179          | 149,449         | 833,086         | 3,310           |
| Total Area<br>(Sq. km)               | 14,568,341       | 383,998          | 34,740,483         | 6,570,509       | 51,154,371      | 24,240,678      |
| <b>Invaded Area</b><br><b>(%age)</b> | 3%               | 55%              | 12%                | 2%              | 2%              | 0.01%           |
| <b>Risk Category</b>                 | <b>Low Risk</b>  | <b>High Risk</b> | <b>Medium Risk</b> | <b>Low Risk</b> | <b>Low Risk</b> | <b>Low Risk</b> |

**Supplementary Table S7:** Regional invasion risk categorization in terms of the area (km<sup>2</sup>) invaded by *Leucanthemum vulgare* under RCP 6.0 2050.

| Category                             | Southern America | Oceania          | Northern America   | Australia       | Asia            | Africa          |
|--------------------------------------|------------------|------------------|--------------------|-----------------|-----------------|-----------------|
| <b>No Risk</b><br>(0 - 0.25)         | 13,645,840       | 116,838          | 27,201,671         | 6,223,453       | 49,608,859      | 24,167,716      |
| <b>Low Risk</b><br>(0.25 - 0.5)      | 213,402          | 11,282           | 1,547,505          | 65,336          | 488,599         | 36,135          |
| <b>Moderate Risk</b><br>(0.5 - 0.75) | 304,547          | 30,190           | 1,957,328          | 89,761          | 375,747         | 26,006          |
| <b>High Risk</b><br>(0.75 - 1)       | 404,553          | 225,688          | 4,033,981          | 191,958         | 681,166         | 10,821          |
| Total Area<br>(Sq. km)               | 14,568,342       | 383,998          | 34,740,485         | 6,570,508       | 51,154,371      | 24,240,678      |
| <b>Invaded Area</b><br><b>(%age)</b> | 3%               | 59%              | 12%                | 3%              | 1%              | 0.04%           |
| <b>Risk Category</b>                 | <b>Low Risk</b>  | <b>High Risk</b> | <b>Medium Risk</b> | <b>Low Risk</b> | <b>Low Risk</b> | <b>Low Risk</b> |

**Supplementary Table S8:** Regional invasion risk categorization in terms of the area (km<sup>2</sup>) invaded by *Leucanthemum vulgare* under RCP 6.0 2070.

| Category                             | Southern America | Oceania          | Northern America   | Australia       | Asia            | Africa          |
|--------------------------------------|------------------|------------------|--------------------|-----------------|-----------------|-----------------|
| <b>No Risk</b><br>(0 - 0.25)         | 13,666,444       | 118,090          | 26,691,842         | 6,261,005       | 49,572,477      | 24,201,825      |
| <b>Low Risk</b><br>(0.25 - 0.5)      | 215,263          | 10,162           | 1,794,802          | 67,214          | 554,067         | 22,959          |
| <b>Moderate Risk</b><br>(0.5 - 0.75) | 280,468          | 44,947           | 2,073,606          | 85,809          | 342,757         | 12,040          |
| <b>High Risk</b><br>(0.75 - 1)       | 406,167          | 210,800          | 4,180,234          | 156,481         | 685,070         | 3854            |
| Total Area<br>(Sq. km)               | 14,568,342       | 383,999          | 34,740,484         | 6,570,509       | 51,154,371      | 24,240,678      |
| Invaded Area<br>(%age)               | 3%               | 55%              | 12%                | 2%              | 1%              | 0.02%           |
| Risk Category                        | <b>Low Risk</b>  | <b>High Risk</b> | <b>Medium Risk</b> | <b>Low Risk</b> | <b>Low Risk</b> | <b>Low Risk</b> |

**Supplementary Table S9:** Regional invasion risk categorization in terms of the area (km<sup>2</sup>) invaded by *Leucanthemum vulgare* under RCP 8.5 2050.

| Category                             | Southern America | Oceania          | Northern America   | Australia       | Asia            | Africa          |
|--------------------------------------|------------------|------------------|--------------------|-----------------|-----------------|-----------------|
| <b>No Risk</b><br>(0 - 0.25)         | 13,694,920       | 118,633          | 26,800,775         | 6,241,998       | 49,687,141      | 24,196,143      |
| <b>Low Risk</b><br>(0.25 - 0.5)      | 186,210          | 11,710           | 1,497,222          | 72,419          | 460,896         | 26,105          |
| <b>Moderate Risk</b><br>(0.5 - 0.75) | 274,225          | 38,227           | 2,012,519          | 80,159          | 282,477         | 13,588          |
| <b>High Risk</b><br>(0.75 - 1)       | 412,985          | 215,428          | 4,429,969          | 175,933         | 723,856         | 4,842           |
| Total Area<br>(Sq. km)               | 14,568,340       | 383,998          | 34,740,485         | 6,570,509       | 51,154,370      | 24,240,678      |
| Invaded Area<br>(%age)               | 3%               | 56%              | 13%                | 3%              | 1%              | 0.02%           |
| Risk Category                        | <b>Low Risk</b>  | <b>High Risk</b> | <b>Medium Risk</b> | <b>Low Risk</b> | <b>Low Risk</b> | <b>Low Risk</b> |

**Supplementary Table S10:** Regional invasion risk categorization in terms of the area (km<sup>2</sup>) invaded by *Leucanthemum vulgare* under RCP 8.5 2070.

| Category                             | Southern America | Oceania          | Northern America   | Australia       | Asia            | Africa          |
|--------------------------------------|------------------|------------------|--------------------|-----------------|-----------------|-----------------|
| <b>No Risk</b><br>(0 - 0.25)         | 13,811,264       | 133,983          | 26,070,215         | 6,327,889       | 48,880,259      | 24,222,231      |
| <b>Low Risk</b><br>(0.25 - 0.5)      | 166,660          | 22,416           | 1,388,668          | 62,092          | 693,914         | 11,249          |
| <b>Moderate Risk</b><br>(0.5 - 0.75) | 195,960          | 50,925           | 2,339,201          | 59,868          | 558,135         | 5,880           |
| <b>High Risk</b><br>(0.75 - 1)       | 394,456          | 176,674          | 4,942,400          | 120,659         | 1,022,062       | 1318            |
| Total Area<br>(Sq. km)               | 14,568,340       | 383,998          | 34,740,484         | 6,570,508       | 51,154,370      | 24,240,678      |
| <b>Invaded Area</b><br><b>(%age)</b> | 3%               | 46%              | 14%                | 2%              | 2%              | 0.01%           |
| <b>Risk Category</b>                 | <b>Low Risk</b>  | <b>High Risk</b> | <b>Medium Risk</b> | <b>Low Risk</b> | <b>Low Risk</b> | <b>Low Risk</b> |

**Supplementary Table S11:** Climatic and topographic variables used to model the distribution of *Leucanthemum vulgare* during the present study. Variables in bold indicate the ones retained after correlation analysis to build the model.

| Factors  | Variables                                                                |
|----------|--------------------------------------------------------------------------|
| Climatic | BIO1 = Annual Mean Temperature                                           |
|          | <b>BIO2 = Mean Diurnal Range (Mean of monthly (max temp - min temp))</b> |
|          | BIO3 = Isothermality (BIO2/BIO7) (* 100)                                 |
|          | BIO4 = Temperature Seasonality (standard deviation *100)                 |
|          | BIO5 = Max Temperature of Warmest Month                                  |
|          | BIO6 = Min Temperature of Coldest Month                                  |
|          | BIO7 = Temperature Annual Range (BIO5-BIO6)                              |
|          | <b>BIO8 = Mean Temperature of Wettest Quarter</b>                        |
|          | BIO9 = Mean Temperature of Driest Quarter                                |
|          | <b>BIO10 = Mean Temperature of Warmest Quarter</b>                       |
|          | <b>BIO11 = Mean Temperature of Coldest Quarter</b>                       |
|          | BIO12 = Annual Precipitation                                             |
|          | BIO13 = Precipitation of Wettest Month                                   |

|             |                                                                     |
|-------------|---------------------------------------------------------------------|
|             | BIO14 = Precipitation of Driest Month                               |
|             | <b>BIO15 = Precipitation Seasonality (Coefficient of Variation)</b> |
|             | BIO16 = Precipitation of Wettest Quarter                            |
|             | <b>BIO17 = Precipitation of Driest Quarter</b>                      |
|             | BIO18 = Precipitation of Warmest Quarter                            |
|             | <b>BIO19 = Precipitation of Coldest Quarter</b>                     |
| Topographic | <b>Altitude</b>                                                     |

**Supplementary Table S12:** Pairwise correlation coefficients between variables. Red colour indicates the variables that are correlated and excluded from the present study

|               | Alt   | <i>bio_1</i> | <i>bio_2</i> | <i>bio_3</i> | <i>bio_4</i> | <i>bio_5</i> | <i>bio_6</i> | <i>bio_7</i> | <i>bio_8</i> | <i>bio_9</i> | <i>bio_10</i> | <i>bio_11</i> | <i>bio_12</i> | <i>bio_13</i> | <i>bio_14</i> | <i>bio_15</i> | <i>Bio_16</i> | <i>Bio_17</i> | <i>bio_18</i> | <i>bio_19</i> |  |
|---------------|-------|--------------|--------------|--------------|--------------|--------------|--------------|--------------|--------------|--------------|---------------|---------------|---------------|---------------|---------------|---------------|---------------|---------------|---------------|---------------|--|
| Alt           | 1     |              |              |              |              |              |              |              |              |              |               |               |               |               |               |               |               |               |               |               |  |
| <i>bio_1</i>  | -0.05 |              |              |              |              |              |              |              |              |              |               |               |               |               |               |               |               |               |               |               |  |
| <i>bio_2</i>  | 0.43  | 0.14         |              |              |              |              |              |              |              |              |               |               |               |               |               |               |               |               |               |               |  |
| <i>bio_3</i>  | 0.36  | 0.69         | 0.36         |              |              |              |              |              |              |              |               |               |               |               |               |               |               |               |               |               |  |
| <i>bio_4</i>  | -0.07 | -0.63        | 0.34         | -0.71        |              |              |              |              |              |              |               |               |               |               |               |               |               |               |               |               |  |
| <i>bio_5</i>  | 0.01  | 0.60         | 0.71         | 0.29         | 0.18         |              |              |              |              |              |               |               |               |               |               |               |               |               |               |               |  |
| <i>bio_6</i>  | -0.06 | <b>0.87</b>  | -0.23        | 0.69         | <b>-0.90</b> | 0.17         |              |              |              |              |               |               |               |               |               |               |               |               |               |               |  |
| <i>bio_7</i>  | 0.06  | -0.52        | 0.58         | -0.51        | <b>0.95</b>  | 0.34         | <b>-0.86</b> |              |              |              |               |               |               |               |               |               |               |               |               |               |  |
| <i>bio_8</i>  | -0.18 | 0.11         | 0.16         | -0.21        | 0.35         | 0.40         | -0.12        | 0.32         |              |              |               |               |               |               |               |               |               |               |               |               |  |
| <i>bio_9</i>  | 0.09  | <b>0.75</b>  | 0.02         | 0.72         | <b>-0.76</b> | 0.26         | <b>0.81</b>  | -0.64        | -0.39        |              |               |               |               |               |               |               |               |               |               |               |  |
| <i>bio_10</i> | -0.15 | <b>0.76</b>  | 0.46         | 0.29         | 0.01         | <b>0.93</b>  | 0.37         | 0.11         | 0.43         | 0.36         |               |               |               |               |               |               |               |               |               |               |  |
| <i>bio_11</i> | -0.01 | <b>0.93</b>  | -0.07        | <b>0.76</b>  | <b>-0.87</b> | 0.29         | <b>0.98</b>  | <b>-0.78</b> | -0.10        | <b>0.84</b>  | 0.48          |               |               |               |               |               |               |               |               |               |  |
| <i>bio_12</i> | 0.23  | 0.30         | 0.04         | 0.44         | -0.40        | -0.004       | 0.34         | -0.33        | -0.35        | 0.43         | 0.04          | 0.37          |               |               |               |               |               |               |               |               |  |
| <i>bio_13</i> | 0.30  | 0.23         | 0.14         | 0.43         | -0.30        | 0.04         | 0.24         | -0.20        | -0.28        | 0.37         | 0.04          | 0.28          | <b>0.90</b>   |               |               |               |               |               |               |               |  |
| <i>bio_14</i> | 0.06  | 0.24         | -0.13        | 0.25         | -0.35        | -0.12        | 0.31         | -0.36        | -0.27        | 0.28         | -0.01         | 0.30          | 0.72          | 0.41          |               |               |               |               |               |               |  |
| <i>bio_15</i> | 0.25  | -0.11        | 0.32         | 0.08         | 0.17         | 0.13         | -0.21        | 0.27         | 0.01         | -0.03        | 0.01          | -0.14         | 0.04          | 0.41          | -0.54         |               |               |               |               |               |  |
| <i>bio_16</i> | 0.28  | 0.24         | 0.11         | 0.43         | -0.32        | 0.02         | 0.26         | -0.23        | -0.30        | 0.38         | 0.03          | 0.30          | <b>0.92</b>   | <b>0.99</b>   | 0.44          | 0.38          |               |               |               |               |  |
| <i>bio_17</i> | 0.10  | 0.29         | -0.09        | 0.31         | -0.39        | -0.06        | 0.35         | -0.37        | -0.30        | 0.35         | 0.03          | 0.35          | <b>0.77</b>   | 0.47          | <b>0.98</b>   | -0.51         | 0.50          |               |               |               |  |
| <i>bio_18</i> | 0.21  | 0.01         | 0.03         | 0.03         | 0.03         | -0.03        | -0.05        | 0.02         | 0.19         | -0.17        | 0.01          | -0.02         | 0.58          | 0.48          | 0.60          | -0.08         | 0.48          | 0.59          |               |               |  |
| <i>bio_19</i> | 0.14  | 0.30         | 0.01         | 0.49         | -0.49        | -0.04        | 0.41         | -0.41        | -0.52        | 0.58         | -0.02         | 0.42          | <b>0.87</b>   | <b>0.81</b>   | 0.53          | 0.10          | <b>0.84</b>   | 0.59          | 0.15          | 1             |  |

**Supplementary Table S13: TSS, AUC (ROC) and KAPPA values for individual models**

| <b>GLM, RUN1</b>  |        |             |             |        |
|-------------------|--------|-------------|-------------|--------|
| Testing.data      | Cutoff | Sensitivity | Specificity |        |
| TSS               | 0.810  | 463         | 94.491      | 86.577 |
| ROC               | 0.951  | 486         | 94.264      | 86.913 |
| KAPPA             | 0.795  | 74          | 98.453      | 77.852 |
| <b>GBM, RUN1</b>  |        |             |             |        |
| Testing.data      | Cutoff | Sensitivity | Specificity |        |
| TSS               | 0.817  | 370         | 95.434      | 86.242 |
| ROC               | 0.954  | 355         | 95.472      | 86.242 |
| KAPPA             | 0.796  | 40          | 98.868      | 75.839 |
| <b>GAM, RUN1</b>  |        |             |             |        |
| Testing.data      | Cutoff | Sensitivity | Specificity |        |
| TSS               | 0.814  | 598         | 93.208      | 88.255 |
| ROC               | 0.954  | 596         | 93.208      | 88.255 |
| KAPPA             | 0.811  | 35          | 98.906      | 77.517 |
| <b>CTA, RUN1</b>  |        |             |             |        |
| Testing.data      | Cutoff | Sensitivity | Specificity |        |
| TSS               | 0.802  | 506.5       | 93.925      | 86.242 |
| ROC               | 0.911  | 507.5       | 93.925      | 86.242 |
| KAPPA             | 0.686  | 171.5       | 94.302      | 85.235 |
| <b>ANN, RUN1</b>  |        |             |             |        |
| Testing.data      | Cutoff | Sensitivity | Specificity |        |
| TSS               | 0.700  | 541.0       | 94.302      | 71.812 |
| ROC               | 0.900  | 545.5       | 85.509      | 84.564 |
| KAPPA             | 0.699  | 102.0       | 97.358      | 70.805 |
| <b>SRE, RUN1</b>  |        |             |             |        |
| Testing.data      | Cutoff | Sensitivity | Specificity |        |
| TSS               | 0.688  | 495         | 76.83       | 91.946 |
| ROC               | 0.844  | 500         | 76.83       | 91.946 |
| KAPPA             | 0.366  | 495         | 76.83       | 91.946 |
| <b>FDA, RUN1</b>  |        |             |             |        |
| Testing.data      | Cutoff | Sensitivity | Specificity |        |
| TSS               | 0.789  | 747.0       | 97.170      | 81.879 |
| ROC               | 0.942  | 757.5       | 94.113      | 85.235 |
| KAPPA             | 0.810  | 677.0       | 99.170      | 75.839 |
| <b>MARS, RUN1</b> |        |             |             |        |
| Testing.data      | Cutoff | Sensitivity | Specificity |        |
| TSS               | 0.803  | 334.0       | 94.755      | 85.570 |
| ROC               | 0.952  | 326.5       | 94.906      | 85.570 |
| KAPPA             | 0.781  | 70.0        | 98.453      | 75.839 |
| <b>RF, RUN1</b>   |        |             |             |        |



| Testing.data                | Cutoff | Sensitivity | Specificity |        |
|-----------------------------|--------|-------------|-------------|--------|
| TSS                         | 0.856  | 889         | 94.717      | 90.940 |
| ROC                         | 0.963  | 888         | 94.717      | 90.940 |
| KAPPA                       | 0.845  | 313         | 98.604      | 84.899 |
| <b>MAXENT Philips, RUN1</b> |        |             |             |        |
| Testing.data                | Cutoff | Sensitivity | Specificity |        |
| TSS                         | 0.720  | 10.0        | 84.151      | 87.248 |
| ROC                         | 0.874  | 67.5        | 82.566      | 89.597 |
| KAPPA                       | 0.486  | 0.0         | 100.000     | 0.000  |
| <b>GLM, RUN2</b>            |        |             |             |        |
| Testing.data                | Cutoff | Sensitivity | Specificity |        |
| TSS                         | 0.823  | 269.5       | 96.717      | 85.570 |
| ROC                         | 0.959  | 258.5       | 96.868      | 85.570 |
| KAPPA                       | 0.829  | 75.0        | 98.868      | 80.201 |
| <b>GBM, RUN2</b>            |        |             |             |        |
| Testing.data                | Cutoff | Sensitivity | Specificity |        |
| TSS                         | 0.817  | 541.0       | 93.774      | 87.919 |
| ROC                         | 0.961  | 497.5       | 94.113      | 87.584 |
| KAPPA                       | 0.822  | 39.0        | 98.943      | 79.530 |
| <b>GAM, RUN2</b>            |        |             |             |        |
| Testing.data                | Cutoff | Sensitivity | Specificity |        |
| TSS                         | 0.818  | 409.0       | 95.509      | 86.242 |
| ROC                         | 0.954  | 400.5       | 95.547      | 86.242 |
| KAPPA                       | 0.822  | 46.0        | 98.981      | 78.859 |
| <b>CTA, RUN2</b>            |        |             |             |        |
| Testing.data                | Cutoff | Sensitivity | Specificity |        |
| TSS                         | 0.849  | 134         | 95.925      | 88.926 |
| ROC                         | 0.941  | 111         | 95.962      | 88.926 |
| KAPPA                       | 0.775  | 59          | 97.887      | 78.188 |
| <b>ANN, RUN2</b>            |        |             |             |        |
| Testing.data                | Cutoff | Sensitivity | Specificity |        |
| TSS                         | 0.729  | 633.0       | 91.396      | 81.544 |
| ROC                         | 0.924  | 629.5       | 91.509      | 81.544 |
| KAPPA                       | 0.685  | 57.0        | 97.925      | 65.772 |
| <b>SRE, RUN2</b>            |        |             |             |        |
| Testing.data                | Cutoff | Sensitivity | Specificity |        |
| TSS                         | 0.682  | 495         | 77.547      | 90.604 |
| ROC                         | 0.841  | 500         | 77.547      | 90.604 |
| KAPPA                       | 0.370  | 495         | 77.547      | 90.604 |
| <b>FDA, RUN2</b>            |        |             |             |        |
| Testing.data                | Cutoff | Sensitivity | Specificity |        |
| TSS                         | 0.811  | 737.0       | 98.000      | 82.886 |
| ROC                         | 0.948  | 749.5       | 96.604      | 84.899 |

|                             |        |             |             |        |
|-----------------------------|--------|-------------|-------------|--------|
| KAPPA                       | 0.816  | 722.0       | 98.868      | 78.523 |
| <b>MARS, RUN2</b>           |        |             |             |        |
| Testing.data                | Cutoff | Sensitivity | Specificity |        |
| TSS                         | 0.810  | 301.5       | 95.094      | 85.906 |
| ROC                         | 0.959  | 290.5       | 95.245      | 85.906 |
| KAPPA                       | 0.812  | 89.0        | 98.491      | 80.537 |
| <b>RF, RUN2</b>             |        |             |             |        |
| Testing.data                | Cutoff | Sensitivity | Specificity |        |
| TSS                         | 0.874  | 786         | 96.755      | 90.604 |
| ROC                         | 0.969  | 824         | 96.453      | 90.940 |
| KAPPA                       | 0.852  | 383         | 98.340      | 87.919 |
| <b>MAXENT Philips, RUN2</b> |        |             |             |        |
| Testing.data                | Cutoff | Sensitivity | Specificity |        |
| TSS                         | 0.748  | 51.0        | 84.000      | 90.604 |
| ROC                         | 0.894  | 51.5        | 83.849      | 90.940 |
| KAPPA                       | 0.537  | 0.0         | 100.000     | 0.000  |
| <b>GLM, RUN3</b>            |        |             |             |        |
| Testing.data                | Cutoff | Sensitivity | Specificity |        |
| TSS                         | 0.837  | 428.0       | 94.075      | 89.597 |
| ROC                         | 0.965  | 426.5       | 94.113      | 89.597 |
| KAPPA                       | 0.806  | 104.0       | 98.000      | 82.886 |
| <b>GBM, RUN3</b>            |        |             |             |        |
| Testing.data                | Cutoff | Sensitivity | Specificity |        |
| TSS                         | 0.843  | 476.0       | 94.113      | 89.933 |
| ROC                         | 0.968  | 476.5       | 94.075      | 90.268 |
| KAPPA                       | 0.799  | 67.0        | 97.774      | 83.221 |
| <b>GAM, RUN3</b>            |        |             |             |        |
| Testing.data                | Cutoff | Sensitivity | Specificity |        |
| TSS                         | 0.841  | 430         | 94.528      | 89.262 |
| ROC                         | 0.964  | 433         | 94.528      | 89.597 |
| KAPPA                       | 0.826  | 36          | 99.057      | 78.859 |
| <b>CTA, RUN3</b>            |        |             |             |        |
| Testing.data                | Cutoff | Sensitivity | Specificity |        |
| TSS                         | 0.839  | 452         | 94.302      | 89.597 |
| ROC                         | 0.934  | 452         | 94.302      | 89.597 |
| KAPPA                       | 0.739  | 70          | 96.377      | 82.215 |
| <b>ANN, RUN3</b>            |        |             |             |        |
| Testing.data                | Cutoff | Sensitivity | Specificity |        |
| TSS                         | 0.688  | 570.5       | 97.019      | 71.812 |
| ROC                         | 0.848  | 571.0       | 97.019      | 71.812 |
| KAPPA                       | 0.693  | 570.5       | 97.019      | 71.812 |
| <b>SRE, RUN3</b>            |        |             |             |        |
| Testing.data                | Cutoff | Sensitivity | Specificity |        |

|                             |        |             |             |        |
|-----------------------------|--------|-------------|-------------|--------|
| TSS                         | 0.711  | 495         | 76.491      | 94.631 |
| ROC                         | 0.856  | 500         | 76.491      | 94.631 |
| KAPPA                       | 0.374  | 495         | 76.491      | 94.631 |
| <b>FDA, RUN3</b>            |        |             |             |        |
| Testing.data                | Cutoff | Sensitivity | Specificity |        |
| TSS                         | 0.816  | 754.0       | 96.000      | 85.570 |
| ROC                         | 0.956  | 756.5       | 94.755      | 87.584 |
| KAPPA                       | 0.787  | 677.0       | 98.642      | 75.839 |
| <b>MARS, RUN3</b>           |        |             |             |        |
| Testing.data                | Cutoff | Sensitivity | Specificity |        |
| TSS                         | 0.831  | 496.0       | 93.132      | 89.933 |
| ROC                         | 0.966  | 496.5       | 93.132      | 89.933 |
| KAPPA                       | 0.794  | 69.0        | 98.075      | 80.537 |
| <b>RF, RUN3</b>             |        |             |             |        |
| Testing.data                | Cutoff | Sensitivity | Specificity |        |
| TSS                         | 0.883  | 829         | 95.396      | 92.953 |
| ROC                         | 0.974  | 824         | 95.472      | 92.953 |
| KAPPA                       | 0.849  | 39          | 98.981      | 82.550 |
| <b>MAXENT Philips, RUN3</b> |        |             |             |        |
| Testing.data                | Cutoff | Sensitivity | Specificity |        |
| TSS                         | 0.773  | 20          | 88.792      | 88.255 |
| ROC                         | 0.907  | 26          | 88.491      | 88.926 |
| KAPPA                       | 0.624  | 0           | 100.000     | 0.000  |
